# Supplementary material
Source: Springer Nature journal article supplement (https://www.springermedizin.de/resource/supplementary/12889_2010_2365_MOESM3_ESM.pdf/9485548)

Scale: (-0.5-1.0)

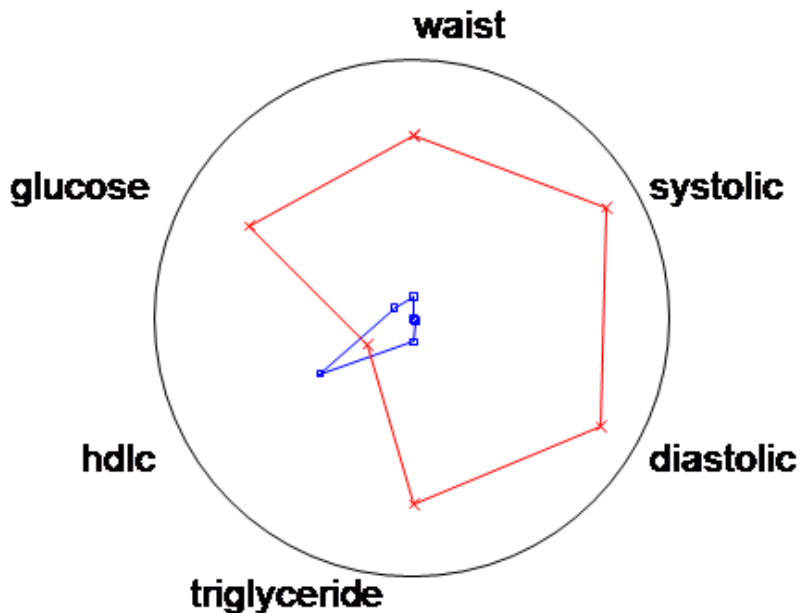

Cluster

—□— Favourable

—x— Adverse

Supplement: MOESM3 [file 9485548]
